# Supplementary material for: Population Dynamics of Fall Armyworm (Lepidoptera: Noctuidae) in Maize Fields in Uganda
Source: MDPI journal article supplement (doi:10.3390/insects15050301), 2024-04-23
Supplement: s1 [file s1]

**Supplementary Table S1:** Multiple linear regression analysis coefficients of the relationship between farm management practices and weather factors with damage and abundance of *Spodoptera frugiperda* larvae in 2020B and 2021A

| Location    | Variable                | Mean number of larvae per 15 plants |            |         |          | Mean leaf damage |            |         |                        |
|-------------|-------------------------|-------------------------------------|------------|---------|----------|------------------|------------|---------|------------------------|
|             |                         | Estimate                            | Std. Error | t value | Pr(> t ) | Estimate         | Std. Error | t value | Pr(> t )               |
| 2020B       |                         |                                     |            |         |          |                  |            |         |                        |
| Kiryandongo | (Intercept)             | 0.18                                | 0.224      | 0.788   | 0.440    | 1.30             | 2.054      | 0.632   | 0.535                  |
|             | Pesticide use frequency | -                                   | -          | -       | -        | -                | -          | -       | -                      |
|             | Fertilizer use          | -                                   | -          | -       | -        | -                | -          | -       | -                      |
|             | Weeding frequency       | 0.02                                | 0.030      | 0.683   | 0.502    | 0.63             | 0.279      | 2.260   | 0.035*                 |
|             | Tillage system          | -                                   | -          | -       | -        | -                | -          | -       | -                      |
|             | Cropping system         | -                                   | -          | -       | -        | -                | -          | -       | -                      |
|             | Rainfall                | 0.00                                | 0.001      | -0.644  | 0.527    | -0.02            | 0.005      | -3.395  | 0.003**                |
|             | Maximum temperature     | -0.01                               | 0.007      | -0.830  | 0.417    | 0.02             | 0.060      | 0.366   | 0.718                  |
| Kole        | (Intercept)             | 0.40                                | 0.531      | 0.750   | 0.462    | -2.53            | 4.314      | -0.586  | 0.564                  |
|             | Pesticide use frequency | -                                   | -          | -       | -        | -                | -          | -       | -                      |
|             | Fertilizer use          | -                                   | -          | -       | -        | -                | -          | -       | -                      |
|             | Weeding frequency       | -                                   | -          | -       | -        | -                | -          | -       | -                      |
|             | Tillage system          | -                                   | -          | -       | -        | -                | -          | -       | -                      |
|             | Rainfall                | 0.00                                | 0.001      | -0.093  | 0.927    | 0.00             | 0.007      | -0.467  | 0.645                  |
|             | Cropping system         | -                                   | -          | -       | -        | -                | -          | -       | -                      |
|             | Maximum temperature     | -0.01                               | 0.015      | -0.713  | 0.484    | 0.13             | 0.119      | 1.081   | 0.292                  |
| Nakaseke    | (Intercept)             | 0.00                                | 0.000      | --      | --       | 2.02             | 2.709      | 0.747   | 0.466                  |
|             | Pesticide use frequency | 0.00                                | 0.000      | --      | --       | 0.06             | 0.150      | 0.380   | 0.709                  |
|             | Fertilizer use          | -                                   | -          | -       | -        | -                | -          | -       | -                      |
|             | Weeding frequency       | -                                   | -          | -       | -        | -                | -          | -       | -                      |
|             | Tillage system          | 0.00                                | 0.000      | --      | --       | 0.70             | 0.301      | 2.329   | 0.033 *                |
|             | Cropping system         | -                                   | -          | -       | -        | -                | -          | -       | -                      |
|             | Rainfall                | 0.00                                | 0.000      | --      | --       | -0.01            | 0.006      | -0.870  | 0.397                  |
|             | Maximum temperature     | 0.00                                | 0.000      | --      | --       | -0.01            | 0.076      | -0.184  | 0.857                  |
| 2021A       |                         |                                     |            |         |          |                  |            |         |                        |
| Kiryandongo | (Intercept)             | 1.47                                | 2.044      | 0.720   | 0.476    | 73.09            | 19.946     | 3.664   | 0.0001***              |
|             | Pesticide use frequency | 0.00                                | 0.039      | -0.076  | 0.940    | -0.27            | 0.385      | -0.702  | 0.487                  |
|             | Fertilizer use          | -0.03                               | 0.062      | -0.467  | 0.643    | 0.69             | 0.608      | 1.126   | 0.267                  |
|             | Weeding frequency       | 0.05                                | 0.062      | 0.844   | 0.403    | 0.12             | 0.608      | 0.189   | 0.851                  |
|             | Tillage system          | 0.08                                | 0.063      | 1.209   | 0.233    | 0.88             | 0.611      | 1.435   | 0.159                  |
|             | Cropping system         | -0.08                               | 0.048      | -1.672  | 0.102    | -0.63            | 0.472      | -1.343  | 0.186                  |
|             | Rainfall                | 0.00                                | 0.002      | -0.806  | 0.425    | -0.08            | 0.016      | -4.953  | 0.1 e <sup>-4***</sup> |
|             | Maximum temperature     | -0.05                               | 0.062      | -0.761  | 0.451    | -2.12            | 0.606      | -3.497  | 0.001**                |
| Kole        | (Intercept)             | -0.37                               | 0.363      | -1.028  | 0.310    | 38.40            | 15.071     | 2.548   | 0.014*                 |
|             | Pesticide use frequency | 0.01                                | 0.011      | 0.854   | 0.398    | 0.25             | 0.449      | 0.552   | 0.584                  |
|             | Fertilizer use          | -0.01                               | 0.011      | -1.130  | 0.265    | -0.21            | 0.475      | -0.447  | 0.657                  |
|             | Weeding frequency       | 0.00                                | 0.017      | -0.225  | 0.823    | -0.07            | 0.712      | -0.096  | 0.924                  |
|             | Tillage system          | -                                   | -          | -       | -        | -                | -          | -       | -                      |
|             | Cropping system         | -0.02                               | 0.011      | -1.804  | 0.078    | -0.43            | 0.475      | -0.902  | 0.372                  |
|             | Rainfall                | 0.00                                | 0.000      | 1.809   | 0.077    | -0.03            | 0.007      | -3.587  | 0.1 e <sup>-3***</sup> |
|             | Maximum temperature     | 0.01                                | 0.012      | 1.088   | 0.283    | -1.12            | 0.479      | -2.342  | 0.024*                 |
| Nakaseke    | (Intercept)             | 0.33                                | 0.189      | 1.724   | 0.092    | 0.86             | 1.675      | 0.513   | 0.610                  |
|             | Pesticide use frequency | -0.01                               | 0.019      | -0.318  | 0.752    | -0.23            | 0.166      | -1.364  | 0.180                  |
|             | Fertilizer use          | 0.10                                | 0.044      | 2.193   | 0.034*   | 1.34             | 0.394      | 3.410   | 0.001**                |
|             | Weeding frequency       | 0.01                                | 0.011      | 1.271   | 0.211    | 0.20             | 0.100      | 2.026   | 0.049*                 |
|             | Tillage system          | 0.00                                | 0.016      | 0.035   | 0.972    | -0.06            | 0.145      | -0.398  | 0.692                  |
|             | Cropping system         | -                                   | -          | -       | -        | -                | -          | -       | -                      |
|             | Rainfall                | 0.00                                | 0.000      | -0.985  | 0.330    | 0.00             | 0.002      | -1.125  | 0.267                  |
|             | Maximum temperature     | -0.01                               | 0.006      | -1.717  | 0.093    | 0.04             | 0.055      | 0.663   | 0.511                  |

Note: (-) Note applicable because only one alternative of a given management practice was done in a given location and season. (- -) No larvae were recovered. Each year's first and second rainy seasons are distinguished by the letters A and B, respectively. \*, \*\* and \*\*\* denote significance at 0.5, 0.1 and 0.01%, respectively.

**Supplementary Table S2:** Multiple linear regression analysis coefficients of the relationship between farm management practices and weather factors with damage and abundance of *Spodoptera frugiperda* larvae in 2021B

| Location    | Variable                | Mean number of larvae per 15 plants |            |         |          | Mean leaf damage |            |         |             |
|-------------|-------------------------|-------------------------------------|------------|---------|----------|------------------|------------|---------|-------------|
|             |                         | Estimate                            | Std. Error | t value | Pr(> t ) | Estimate         | Std. Error | t value | Pr(> t )    |
| 2021B       |                         |                                     |            |         |          |                  |            |         |             |
| Kiryandongo | (Intercept)             | 0.29                                | 0.382      | 0.750   | 0.457    | 4.96             | 2.029      | 2.444   | 0.018*      |
|             | Pesticide use frequency | -0.02                               | 0.071      | -0.294  | 0.770    | 0.43             | 0.376      | 1.153   | 0.254       |
|             | Fertilizer use          | -0.06                               | 0.071      | -0.883  | 0.381    | -0.82            | 0.376      | -2.173  | 0.034*      |
|             | Weeding frequency       | -0.01                               | 0.050      | -0.208  | 0.836    | 0.38             | 0.266      | 1.411   | 0.164       |
|             | Tillage system          | 0.06                                | 0.058      | 1.082   | 0.284    | 1.15             | 0.307      | 3.747   | 0.4e-3***   |
|             | Cropping system         | -                                   | -          | -       | -        | -                | -          | -       | -           |
|             | Rainfall                | 0.00                                | 0.001      | 1.791   | 0.0789   | -0.03            | 0.004      | -6.996  | 0.4e-8***   |
| Kole        | Maximum temperature     | -0.01                               | 0.012      | -0.786  | 0.436    | -0.11            | 0.064      | -1.751  | 0.086       |
|             | (Intercept)             | 0.12                                | 0.546      | 0.228   | 0.821    | 4.11             | 2.704      | 1.521   | 0.136       |
|             | Pesticide use frequency | -0.02                               | 0.051      | -0.298  | 0.767    | -0.40            | 0.253      | -1.583  | 0.121       |
|             | Fertilizer use          | 0.00                                | 0.050      | -0.044  | 0.965    | 0.83             | 0.246      | 3.389   | 0.002**     |
|             | Weeding frequency       | 0.03                                | 0.045      | 0.721   | 0.475    | 0.41             | 0.224      | 1.815   | 0.077       |
|             | Tillage system          | -                                   | -          | -       | -        | -                | -          | -       | -           |
|             | Cropping system         | -0.03                               | 0.060      | -0.434  | 0.666    | -0.31            | 0.297      | -1.053  | 0.298       |
| Nakaseke    | Rainfall                | 0.00                                | 0.001      | 2.398   | 0.021 *  | -0.03            | 0.006      | -4.643  | 0.323e-4*** |
|             | Maximum temperature     | -0.01                               | 0.018      | -0.311  | 0.757    | -0.04            | 0.088      | -0.485  | 0.630       |
|             | (Intercept)             | -0.17                               | 0.212      | -0.820  | 0.416    | 5.63             | 1.122      | 5.016   | 0.6e-5***   |
|             | Pesticide use frequency | 0.00                                | 0.026      | 0.147   | 0.884    | -0.16            | 0.137      | -1.139  | 0.260       |
|             | Fertilizer use          | -0.04                               | 0.036      | -1.166  | 0.249    | 0.14             | 0.189      | 0.757   | 0.452       |
|             | Weeding frequency       | -0.05                               | 0.033      | -1.503  | 0.139    | 0.06             | 0.173      | 0.361   | 0.719       |
|             | Tillage system          | 0.07                                | 0.033      | 2.054   | 0.045*   | 0.39             | 0.176      | 2.192   | 0.033*      |
|             | Rainfall                | 0.00                                | 0.001      | -0.439  | 0.663    | -0.01            | 0.003      | -3.824  | 0.3e-3***   |
|             | Cropping system         | -0.09                               | 0.052      | -1.760  | 0.084    | -0.10            | 0.273      | -0.351  | 0.727       |
|             | Maximum temperature     | 0.01                                | 0.007      | 1.380   | 0.174    | -0.12            | 0.038      | -3.105  | 0.003**     |

Note: (-) Note applicable because only one alternative of a given management practice was done in a given location and season. Each year's first and second rainy seasons are distinguished by the letters A and B, respectively. \*, \*\* and \*\*\* denote significance at 0.5, 0.1 and 0.01%, respectively.
